# Supplementary material for: Acidification is an Essential Process of Cold Atmospheric Plasma and Promotes the Anti-Cancer Effect on Malignant Melanoma Cells
Source: PubMed Central journal article supplement (PMC6562457; doi:10.3390/cancers11050671), 2019-05-14
Supplement: cancers-11-00671-s001.pdf [file cancers-11-00671-s001.pdf]

Article

# Acidification is an Essential Process of Cold Atmospheric Plasma and Promotes the Anti-Cancer Effect on Malignant Melanoma Cells

Christin Schneider, Lisa Gebhardt, Stephanie Arndt, Sigrid Karrer, Julia L. Zimmermann, Michael J.M. Fischer and Anja-Katrin Bosserhoff

## Supplementary Material

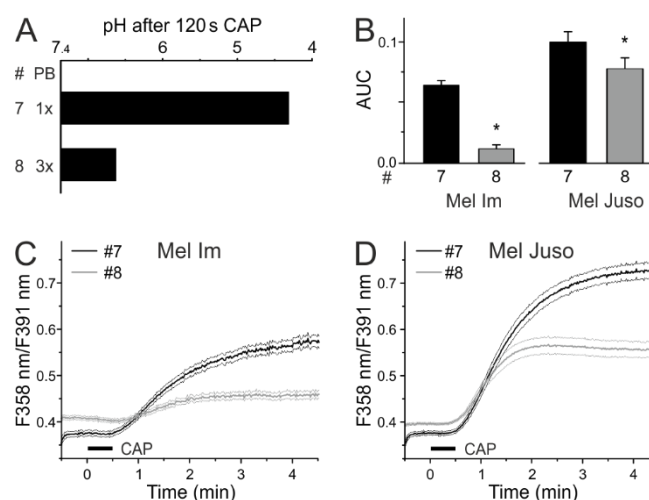

**Figure S1.** The CAP-induced intracellular Ca<sup>2+</sup> influx is pH dependent. (A) PH measurement of 120 s CAP treated pbECS - Ca<sup>2+</sup> (#7) and 3x buffered pbECS - Ca<sup>2+</sup> (#8). (B–D) Analysis of 30 s CAP-induced Ca<sup>2+</sup> influx in Mel Im ((B–C), *n* = 225–464) and Mel Juso ((B,D), *n* = 357–427) cells by using pbECS - Ca<sup>2+</sup> (#7) and 3x buffered pbECS - Ca<sup>2+</sup> (#8).

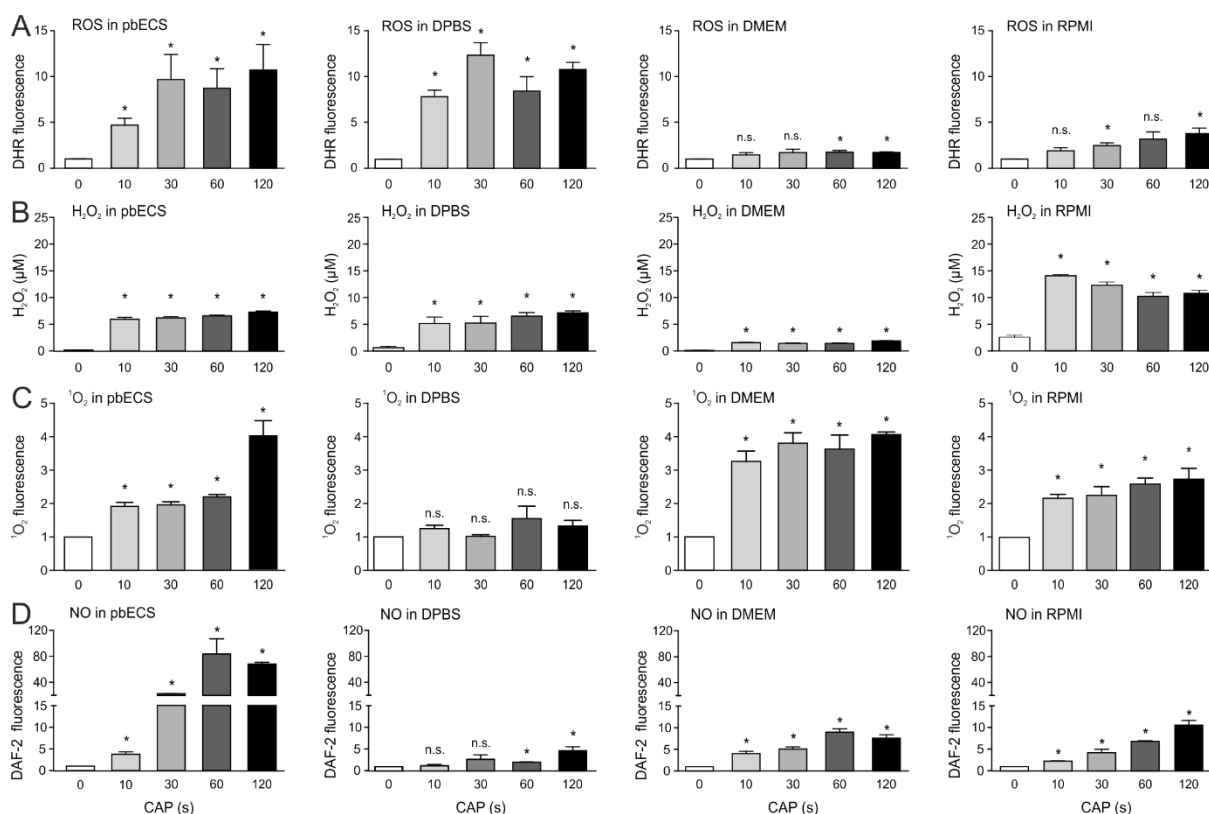

**Figure S2.** CAP-produced reactive species vary in different media. (A) Fluorescence spectroscopic analysis of CAP-induced species production in  $7 \times 20 \mu\text{L}$  drops of pbECS (#4), DPBS, DMEM and RPMI, by using DHR 123 (A), Fluorimetric Hydrogen Peroxide Assay Kit (B), Singlet Oxygen Sensor Green Reagent (C) and DAF-2 (D). Data are mean  $\pm$  SEM.

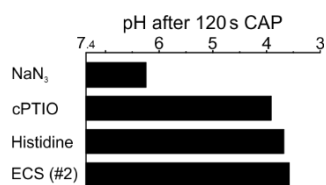

**Figure S3.** The CAP-induced acidification could be inhibited by NaN<sub>3</sub>. PH measurement of ECS (#2,  $7 \times 20 \mu\text{L}$  drops) solutions, supplemented with histidine (3 mM), cPTIO (100  $\mu\text{M}$ ) or NaN<sub>3</sub> (5 mM), after 120 s CAP-treatment.

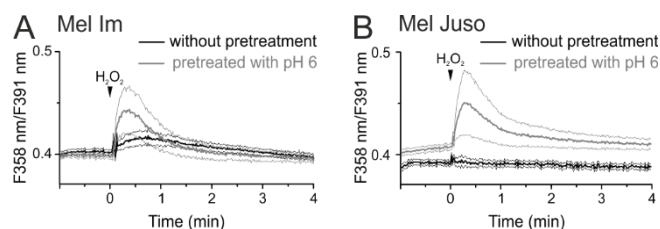

**Figure S4.** Application of H<sub>2</sub>O<sub>2</sub> onto melanoma cells causes a minor Ca<sup>2+</sup> influx. H<sub>2</sub>O<sub>2</sub> (6  $\mu\text{M}$ ), solved in pbECS (#4) pH 6 or pH 7.4, was added onto Mel Im ((A),  $n = 334\text{--}343$ ) and Mel Juso ((B),  $n = 299\text{--}370$ ) cells, which were pretreated for 5 min with the same solution without H<sub>2</sub>O<sub>2</sub>.

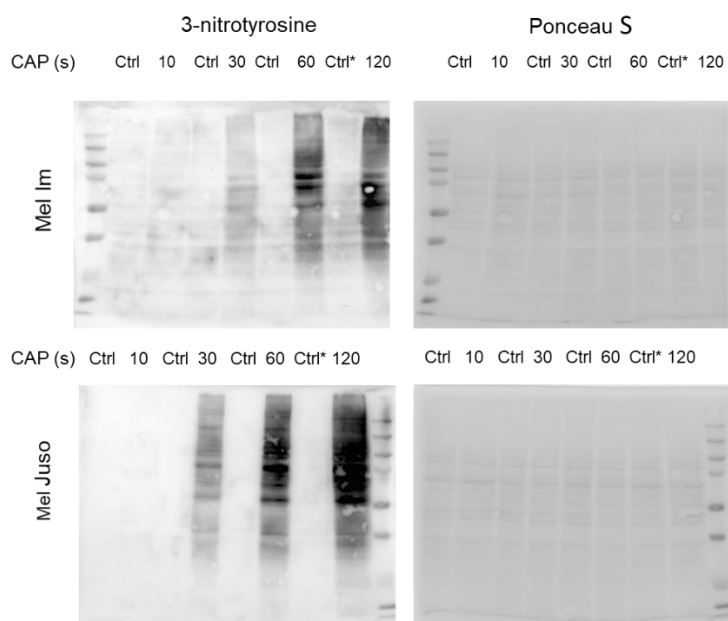

**Figure S5.** Whole blots of the Western Blot analysis of CAP-induced protein nitration after direct CAP treatment of Mel Im and Mel Juso cells, shown in Figure 4F. Ctrl\* (120 s without medium) was used for the densitometric measurement.

**Table 1.** Densitometric evaluation of the Western Blot analysis shown in Figure 4F,G. Values represent the mean pixel intensity per lane ( $n = 3$ , arbitrary unit, values  $\times 10^6$ ).

| <b>Figure 4F</b>       |  | <b>Ctrl*</b> | <b>10 s CAP</b>  | <b>30 s CAP</b>         | <b>60 s CAP</b>               | <b>120 s CAP</b> |
|------------------------|--|--------------|------------------|-------------------------|-------------------------------|------------------|
| <b>Pixel Intensity</b> |  |              |                  |                         |                               |                  |
| <b><u>Mel Im</u></b>   |  |              |                  |                         |                               |                  |
| <b>3-nitrotyrosine</b> |  | 14           | 6                | 32                      | 52                            | 43               |
| <b>Poncau S</b>        |  | 23           | 24               | 26                      | 26                            | 26               |
| <b><u>Mel Juso</u></b> |  |              |                  |                         |                               |                  |
| <b>3-nitrotyrosine</b> |  | 13           | 12               | 29                      | 48                            | 53               |
| <b>Poncau S</b>        |  | 20           | 20               | 20                      | 19                            | 20               |
| <b>Figure 4G</b>       |  | <b>Ctrl</b>  | <b>120 s CAP</b> | <b>120 s CAP + NaOH</b> | <b>120 s CAP + NaOH + HCl</b> |                  |
| <b>Pixel Intensity</b> |  |              |                  |                         |                               |                  |
| <b><u>Mel Im</u></b>   |  |              |                  |                         |                               |                  |
| <b>3-nitrotyrosine</b> |  | 14           | 24               | 16                      | 30                            |                  |
| <b>Poncau S</b>        |  | 64           | 56               | 69                      | 69                            |                  |
| <b><u>Mel Juso</u></b> |  |              |                  |                         |                               |                  |
| <b>3-nitrotyrosine</b> |  | 17           | 25               | 14                      | 28                            |                  |
| <b>Poncau S</b>        |  | 81           | 73               | 72                      | 82                            |                  |

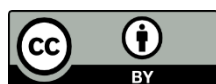

© 2019 by the authors. Licensee MDPI, Basel, Switzerland. This article is an open access article distributed under the terms and conditions of the Creative Commons Attribution (CC BY) license (<http://creativecommons.org/licenses/by/4.0/>).
